# Supplementary material for: “We’re Just Geeks”: Disciplinary Identifications Among Business Students and Their Implications for Personal Responsibility
Source: Springer Nature journal article supplement (doi:10.1007/s10551-021-04759-7), 2021-02-25
Supplement: MOESM3 [file 18904758]

Appendix

| Study Programme | Year | Total no. of students | Male | Female |
| --- | --- | --- | --- | --- |
| Business Administration | 1 | 4 | 2 | 2 |
| Business Administration | 2 | 6 | 3 | 3 |
| Business Administration | 3 | 8 | 4 | 4 |
| Area Studies | 1 | 4 | 2 | 2 |
| Area Studies | 2 | 3 | 1 | 2 |
| Area Studies | 3 | 4 | 2 | 2 |
| Business & Philosophy | 2 | 7 | 3 | 4 |
| Business & Philosophy | 3 | 5 | no info | no info |
| International Business | 2 | 3 | 2 | 1 |
| Business & Politics | 1 | 4 | 4 | 0 |
| Business & Politics | 2 | 3 | 3 | 0 |
| Data Management | 1 | 5 | 0 | 5 |
| Data Management | 2 | 4 | 3 | 1 |
| Data Management | 3 | 3 | 0 | 3 |
| Business & Communication | 1 | 3 | 0 | 3 |
| Business & Communication | 2 | 5 | 4 | 1 |
| Business & Communication | 3 | 4 | 0 | 4 |
| Shipping | 1 | 4 | no info | no info |
| Business & IT | 1 | 5 | 5 | 0 |
| Business and IT | 2 | 5 | 5 | 0 |
| Business & IT | 3 | 5 | 4 | 1 |
| Business & Law | 1 | 5 | 1 | 4 |
| Business & Law | 2 | 2 | 2 | 0 |
| Business & Mathematics | 1 | 6 | 2 | 4 |
| Business & Mathematics | 2 | 5 | 0 | 5 |
| Business & Mathematics | 3 | 4 | 0 | 4 |
| Business & Service Management | 1 | 6 | 4 | 2 |
| Business & Service Management | 2 | 4 | 2 | 1 |
| Business & Service Management | 3 | 5 | 1 | 4 |
| Business & Sociology | 1 | 3 | 1 | 2 |
| Business & Sociology | 2 | 4 | 2 | 2 |
| Business & Sociology | 3 | 6 | 2 | 4 |
| Business & Area Studies (Oriental) | 2 | 4 |  |  |
| Business & Area Studies (Oriental) | 3 | 3 | 1 | 2 |
| Business & English | 1 | 6 | 2 | 4 |
| Business & English | 2 | 6 | 1 | 5 |
| Business & English | 3 | 5 | 0 | 5 |
